# Supplementary material for: Serelaxin activates eNOS, suppresses inflammation, attenuates developmental delay and improves cognitive functions of neonatal rats after germinal matrix hemorrhage
Source: PubMed Central journal article supplement (PMC7229117; doi:10.1038/s41598-020-65144-4), 2020-05-15

## SUPPLEMENTAL MATERIAL

### **Serelaxin activates eNOS, suppresses inflammation, attenuates developmental delay and improves cognitive functions of neonatal rats after germinal matrix hemorrhage**

Mingming Xu<sup>1,4</sup>, Seyler L<sup>2</sup>, Bäuerle T<sup>2</sup>, Kalinichenko LS<sup>3</sup>, Müller CP<sup>3</sup>, Huttner HB<sup>1</sup>, Schwab S<sup>1</sup>, Manaenko A<sup>1</sup> ✉.

<sup>1</sup>Department of Neurology, University Clinic, Friedrich-Alexander-University Erlangen-Nuremberg, Erlangen, Germany.

<sup>2</sup> Department of Radiology, University Clinic, Friedrich-Alexander-University Erlangen-Nuremberg, Erlangen, Germany.

<sup>3</sup>Department of Psychiatry and Psychotherapy, University Clinic, Friedrich-Alexander-University Erlangen-Nuremberg, Germany.

<sup>4</sup>Department of Neurology, Xinhua hospital affiliated to Shanghai Jiaotong University School of Medicine, Shanghai, China.

✉ Corresponding author, electronic address: [Anatol\\_Manaenko@outlook.com](mailto:Anatol_Manaenko@outlook.com)

# Supplemental Fig. 1 Overall Study Design

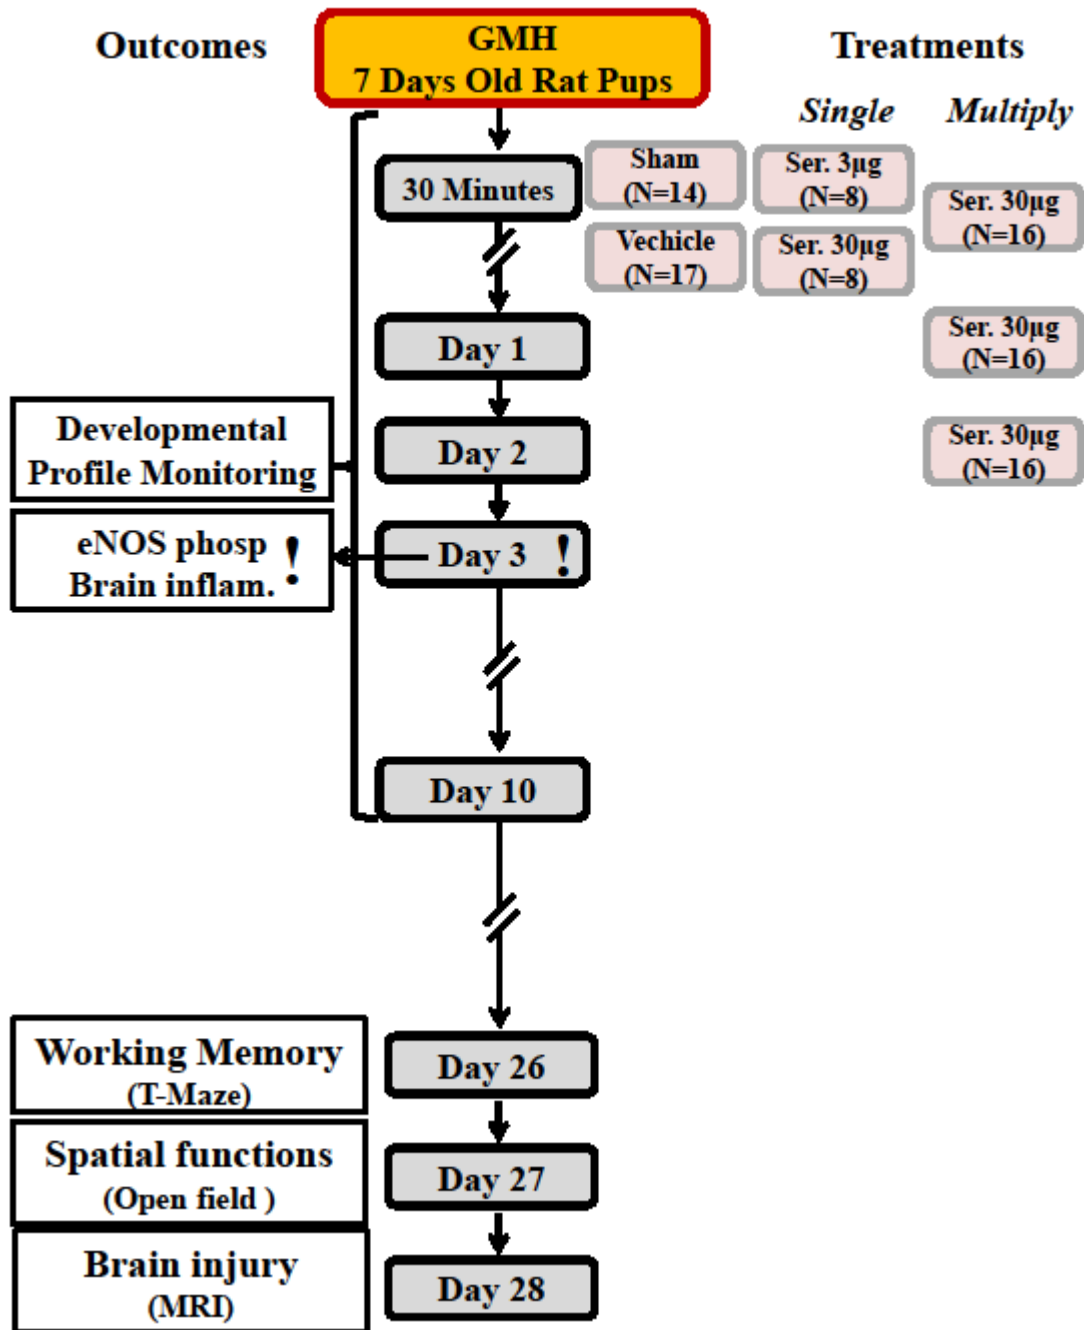

Supplemental Fig. 2

**Representative MRI scans of animals` brains 28 days after  
GMH**

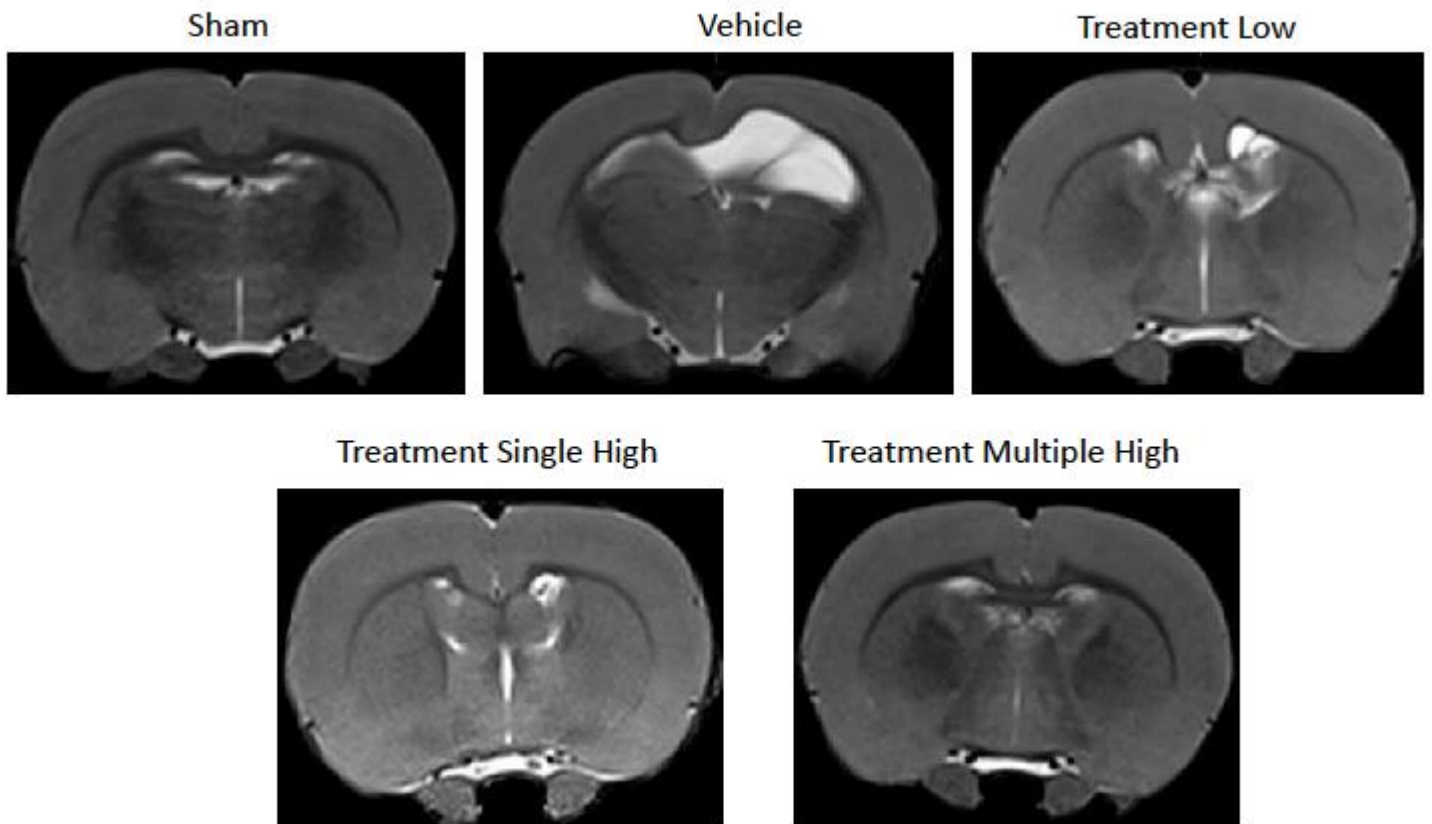

Supplemental Fig. 3

Results of western blot study.

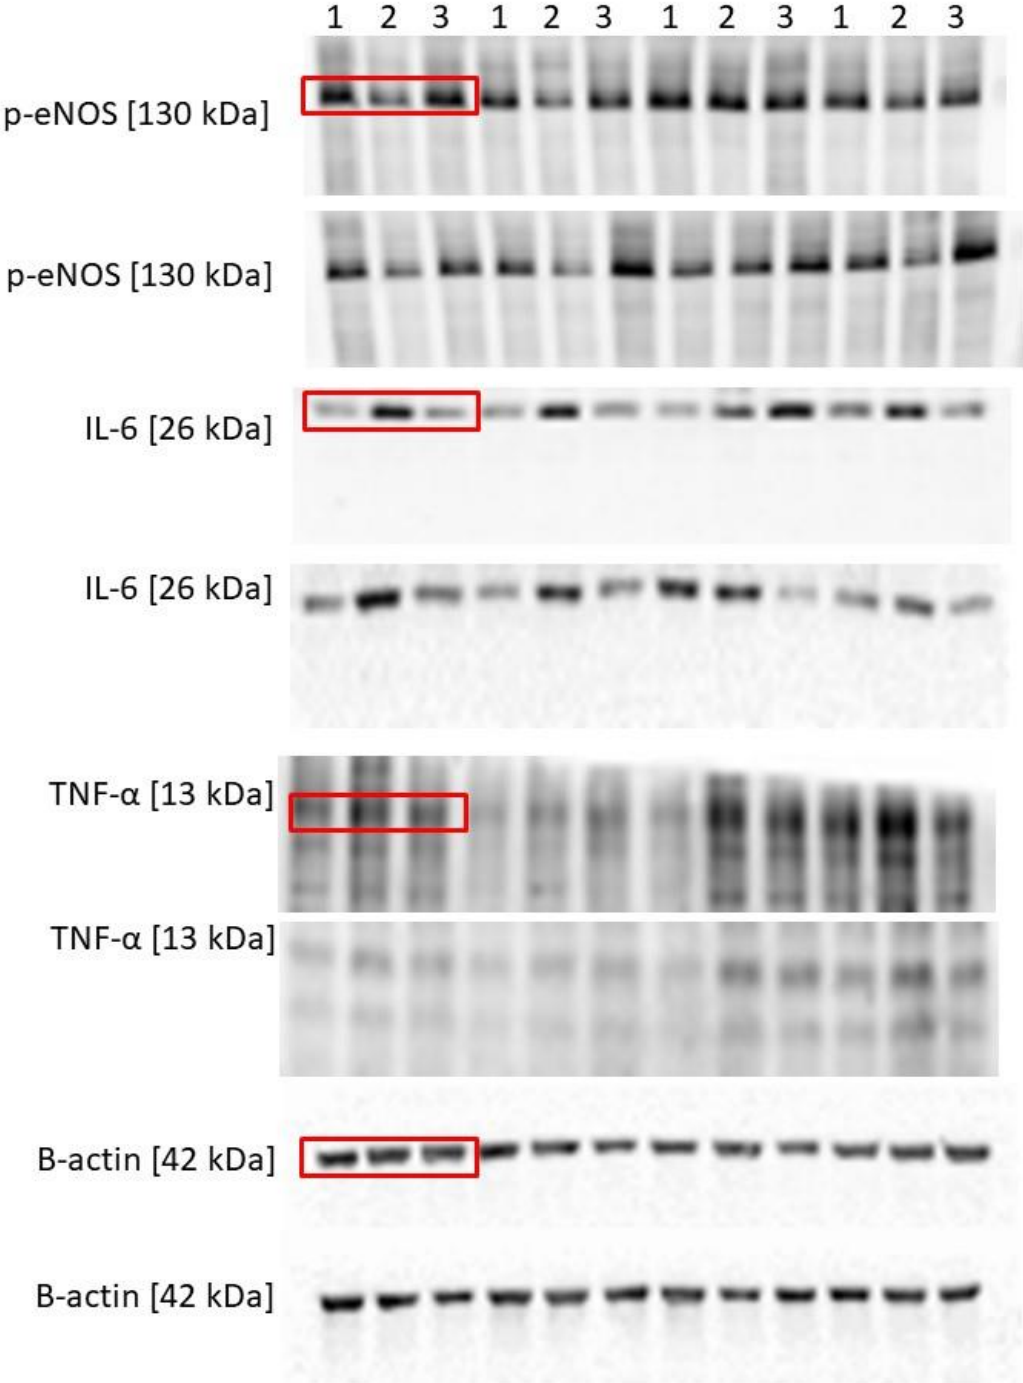

Supplement: 41598_2020_65144_MOESM1_ESM.pdf [file 41598_2020_65144_MOESM1_ESM.pdf]
